# Supplementary material for: ST6Gal-I–mediated sialylation of the epidermal growth factor receptor modulates cell mechanics and enhances invasion
Source: PubMed Central journal article supplement (PMC8956946; doi:10.1016/j.jbc.2022.101726), 2022-02-12
Supplement: mmc1.pdf [file mmc1.pdf]

**ST6Gal-I-mediated sialylation of the epidermal growth factor receptor modulates cell mechanics and enhances invasion**

Tejeshwar C. Rao<sup>1</sup>, Reena R. Beggs<sup>1</sup>, Katherine E. Ankenbauer<sup>1</sup>, Jihye Hwang<sup>1</sup>, Victor Pui-Yan Ma<sup>2</sup>, Khalid Salaita<sup>2</sup>, Susan L. Bellis<sup>1</sup> and Alexa L. Mattheyses<sup>1</sup>

<sup>1</sup>Department of Cell, Developmental, and Integrative Biology, University of Alabama at Birmingham, Birmingham AL 35294

<sup>2</sup>Department of Chemistry, Emory University, Atlanta, Georgia 30322, USA

**Supplementary Figures:**

Figure S1. Schematic for TGT surface synthesis

Figure S2. ST6Gal-I regulates cell spreading, integrin tension and FA maturation irrespective of the underlying substrate tension threshold

Figure S3. ST6Gal-I dependent sialylation does not alter the sialylation profile of key integrin subtypes

Figure S4. ST3Gal-4 overexpression does not regulate cell spreading, integrin tension and FA maturation in an EGF-dependent manner

Figure S5. Analysis pipeline to evaluate ST6Gal-I OE dependent changes in the leading edge of a migratory cell with EGF stimulation

Figure S6. ST6Gal-I promotes mechanical tension primarily via ERK signaling on 12 pN TGTs

Figure S7. Validation of ST6Gal-I expression and  $\alpha$ 2,6 sialylation in OVCAR3, OVCAR5, and OV4 cell lines

Figure S8. MGAT5 does not influence ST6Gal-I mediated EGFR sialylation in Cos-7 cells

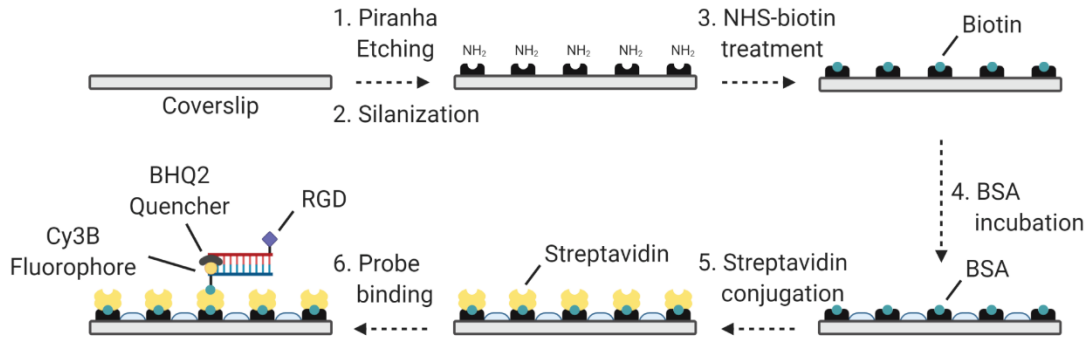

**Figure S1. Schematic for TGT surface synthesis.** Flowchart illustrating the fabrication process for the TGT-based tension surface (see methods for full description).



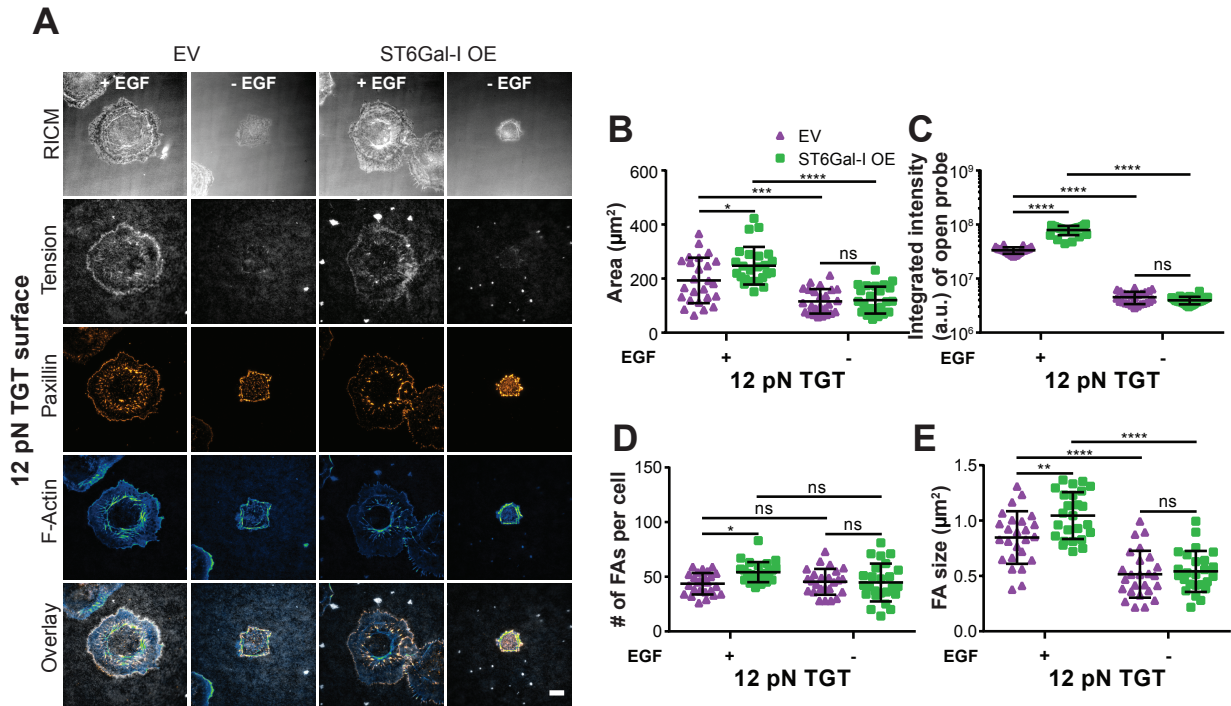

**Figure S2. ST6Gal-I regulates cell spreading, integrin tension and FA maturation irrespective of the underlying substrate tension threshold.** (A) Images of empty vector (EV) and ST6Gal-I OE Cos-7 cells on 12 pN TGT surfaces 90 mins post plating in the presence or absence of EGF (RICM, integrin tension - grayscale, paxillin - orange hot, and actin - green blue; scale bar = 10  $\mu\text{m}$ ). (B-E) Quantification of the (B) cell spread area (with EGF: EV,  $193.3 \pm 84.0 \mu\text{m}^2$ , OE,  $247.6 \pm 69.6 \mu\text{m}^2$ ; without EGF: EV,  $116.0 \pm 45.1 \mu\text{m}^2$ , OE,  $120.4 \pm 49.6 \mu\text{m}^2$ ), (C) integrated intensity of open probes (with EGF: EV,  $4.0 \times 10^7 \pm 2.7 \times 10^6$  a.u., OE,  $8.2 \times 10^7 \pm 3.2 \times 10^6$  a.u.; without EGF: EV,  $8.6 \times 10^6 \pm 3.6 \times 10^5$  a.u., OE,  $8.4 \times 10^6 \pm 2.4 \times 10^5$  a.u.), (D) number of FAs per cell (with EGF: EV,  $43.6 \pm 9.8$ , OE,  $54.2 \pm 9.2$ ; without EGF: EV,  $45.4 \pm 11.8$ , OE,  $44.8 \pm 17.3$ ), and (E) FA size (with EGF: EV,  $0.85 \pm 0.2 \mu\text{m}^2$ , OE,  $1.04 \pm 0.2 \mu\text{m}^2$ ; without EGF: EV,  $0.52 \pm 0.2 \mu\text{m}^2$ , OE,  $0.54 \pm 0.2 \mu\text{m}^2$ ). (mean  $\pm$  SD,  $n = 25$  cells across three independent experiments;  $^{ns}p > 0.05$ ,  $^*p < 0.05$ ,  $^{**}p < 0.01$ ,  $^{****}p < 0.0001$  by one-way ANOVA with Tukey's test).

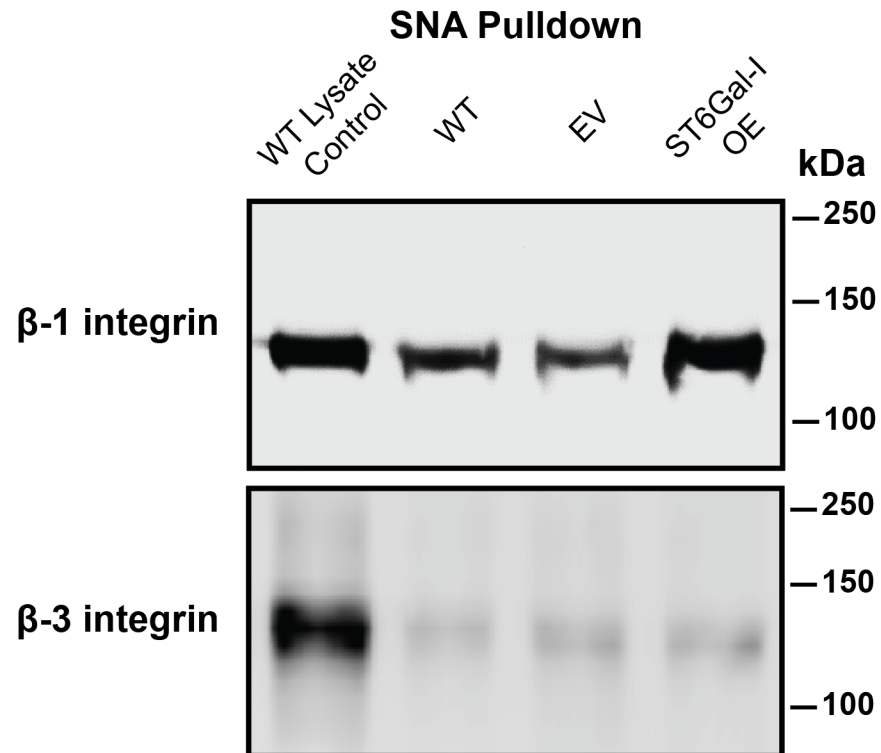

**Figure S3. ST6Gal-I dependent sialylation does not alter the sialylation profile of key integrin subtypes.** Representative immunoblots of  $\beta$ 1 and  $\beta$ 3 integrin following SNA pulldown from Cos-7 cells with ST6Gal-I overexpression (OE), empty vector (EV), and wildtype (WT) controls with EGF stimulation (10 min). WT cell lysate was used as a loading control.

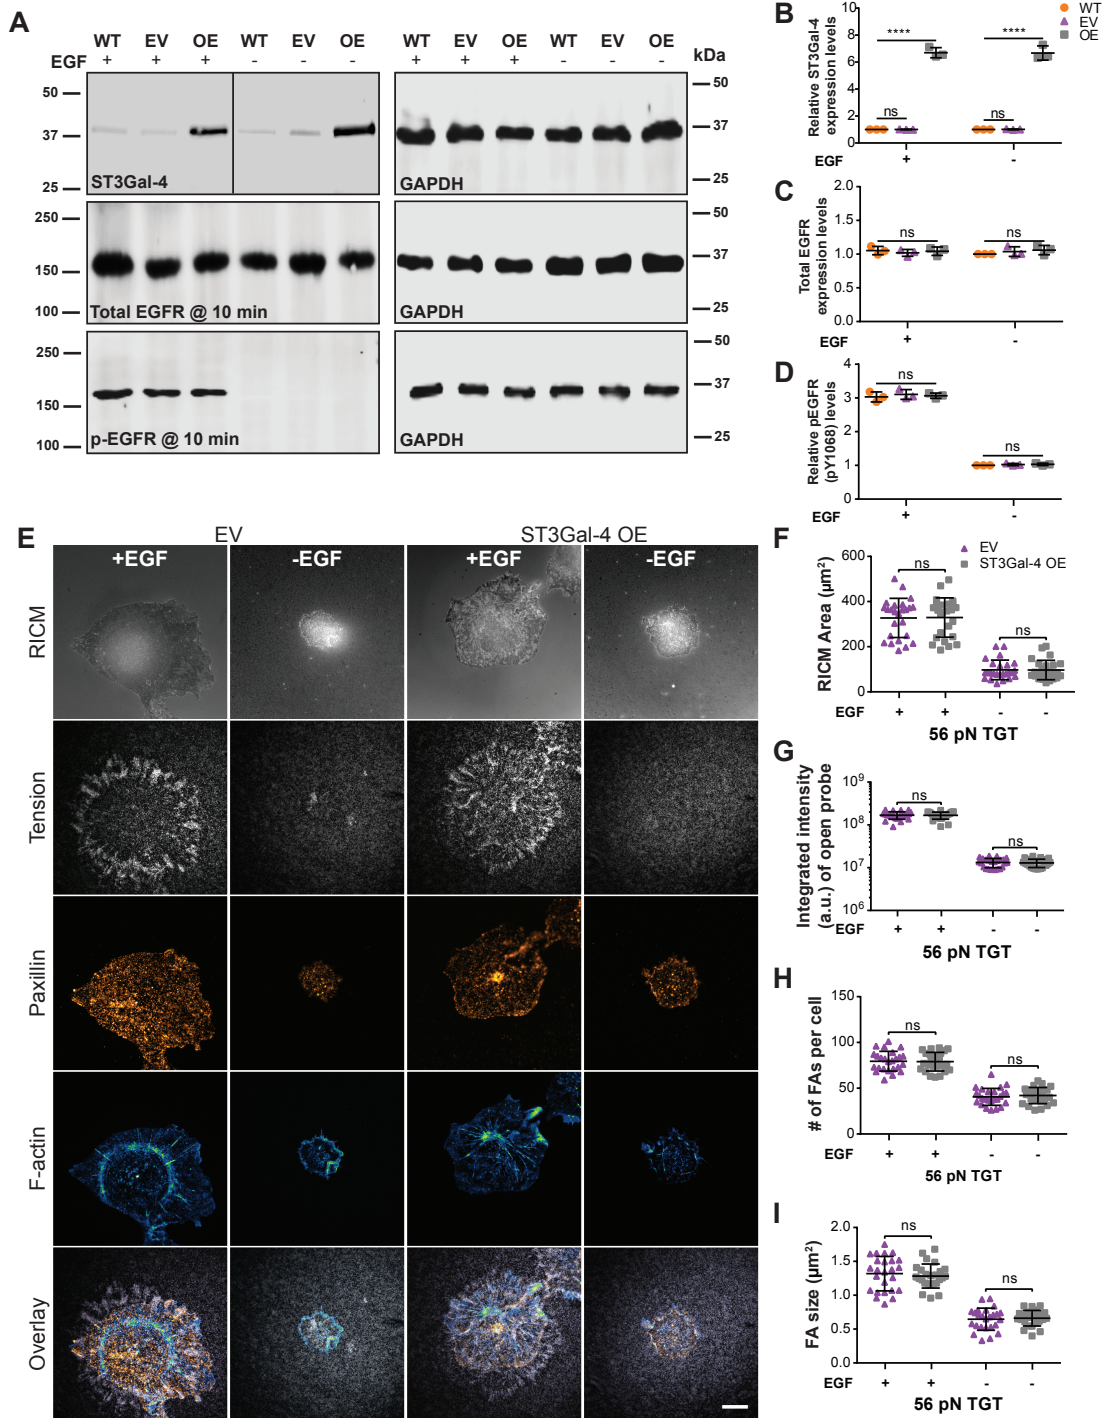

**Figure S4. ST3Gal-4 overexpression does not regulate cell spreading, integrin tension and FA maturation in an EGF-dependent manner.** (A) Representative immunoblots of ST3Gal-4, total EGFR, and pEGFR from Cos-7 cells stably transduced with lentivirus encoding human ST3Gal-4 (OE) or empty vector (EV) and wildtype (WT) controls with (10 min) or without EGF stimulation. GAPDH was used as the loading control. (B-D) Quantification of (B) ST3Gal-4, (C) total EGFR, and (D) p-EGFR normalized to WT cells without EGF treatment. (mean  $\pm$  SD, n = 3 independent sets of

experiments; <sup>ns</sup>p > 0.05, \*p < 0.05, \*\*\*p < 0.001, \*\*\*\*p < 0.0001 by one-way ANOVA with Tukey's test). **(E)** Images of empty vector (EV) and ST3Gal-4 overexpressing (OE) Cos-7 cells on a 56 pN TGT surface 90 mins post plating in the presence or absence of EGF (RICM, integrin tension - grayscale, paxillin - orange hot, and actin - green blue; scale bar = 10  $\mu\text{m}$ ). **(F-I)** Quantification of the **(F)** cell spread area (with EGF: EV,  $327.0 \pm 86.6 \mu\text{m}^2$ , OE,  $329 \pm 86.8 \mu\text{m}^2$ ; without EGF: EV,  $97.4 \pm 43.4 \mu\text{m}^2$ , OE,  $96.7 \pm 43.1 \mu\text{m}^2$ ), **(G)** integrated intensity of open probes (with EGF: EV,  $1.7 \cdot 10^8 \pm 3.4 \cdot 10^7$  a.u., OE,  $1.7 \cdot 10^8 \pm 3.2 \cdot 10^7$  a.u.; without EGF: EV,  $1.3 \cdot 10^7 \pm 3.3 \cdot 10^6$  a.u., OE,  $1.3 \cdot 10^7 \pm 2.9 \cdot 10^6$  a.u.), **(H)** number of focal adhesions (FAs) per cell (with EGF: EV,  $79.5 \pm 10.8$ , OE,  $79.0 \pm 10.2$ ; without EGF: EV,  $40.6 \pm 9.3$ , OE,  $42.0 \pm 8.8$ ), and **(I)** FA size (with EGF: EV -  $1.32 \pm 0.3 \mu\text{m}^2$ , OE,  $1.28 \pm 0.2 \mu\text{m}^2$ ; without EGF: EV,  $0.65 \pm 0.2 \mu\text{m}^2$ , OE,  $0.66 \pm 0.1 \mu\text{m}^2$ ) (mean  $\pm$  SD, n = 25 cells across three independent experiments; <sup>ns</sup>p > 0.05, \*p < 0.05, \*\*p < 0.01, \*\*\*\*p < 0.0001 by one-way ANOVA with Tukey's test).

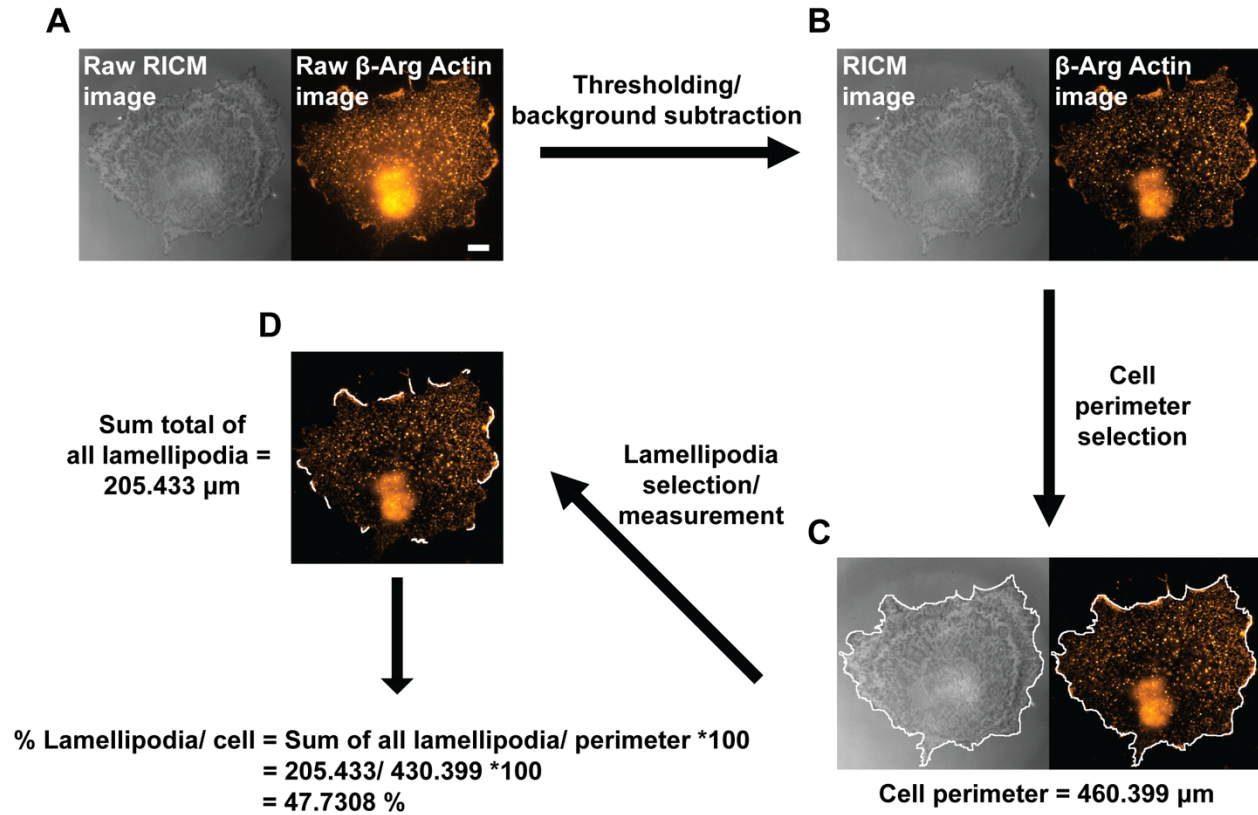

**Figure S5. Analysis pipeline to evaluate ST6Gal-I OE dependent changes in the leading edge of a migratory cell with EGF stimulation.** The pipeline is demonstrated with the representative ST6Gal-I OE Cos-7 cell from Figure 5A. **(A)** Representative ST6Gal-I OE Cos-7 cell with images of the cell footprint (RICM) and  $\beta$ -arginylated actin (TIRF) (scale bar = 10  $\mu\text{m}$ ) **(B)** Images from **(A)** after thresholding and background subtraction. **(C)** The cell perimeter was outlined manually using the RICM image as a reference to define the cell boundary. **(D)** The lamellipodia edge with  $\beta$ -arginylated actin was selected using the TIRF image. The percentage lamellipodia per cell was calculated as a ratio of the perimeter positive for lamellipodia over the total cell perimeter multiplied by 100.



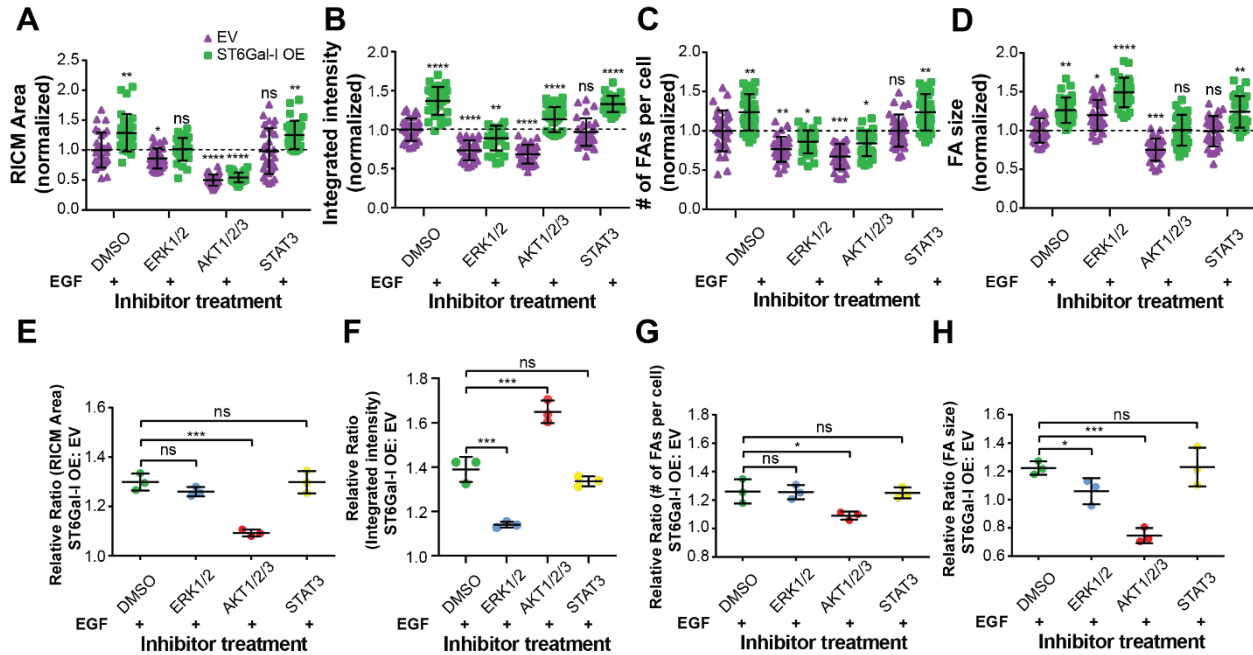

**Figure S6. ST6Gal-I promotes mechanical tension primarily via ERK signaling on 12 pN TGTs.** ST6Gal-I OE and EV Cos-7 cells were treated with control (DMSO) Erk, Akt, or STAT inhibitors with EGF on a 12 pN TGT surface, fixed and imaged 90 mins post plating. (A-D) Scatter plots normalized to control treated EV cells of the (A) RICM area (EV: DMSO,  $1.00 \pm 0.29$ ; ERK,  $0.86 \pm 0.17$ ; AKT,  $0.49 \pm 0.09$ ; STAT,  $0.98 \pm 0.38$ ; OE: DMSO,  $1.29 \pm 0.31$ ; ERK,  $1.01 \pm 0.19$ ; AKT,  $0.54 \pm 0.08$ ; STAT,  $1.25 \pm 0.24$ ), (B) integrated intensity of open probes (EV: DMSO,  $1.00 \pm 0.15$ ; ERK,  $0.73 \pm 0.13$ ; AKT,  $0.69 \pm 0.12$ ; STAT,  $0.97 \pm 0.18$ ; OE: DMSO,  $1.37 \pm 0.18$ ; ERK,  $0.89 \pm 0.16$ ; AKT,  $1.13 \pm 0.16$ ; STAT,  $1.33 \pm 0.10$ ), (C) number of focal adhesions (FAs) per cell (EV: DMSO,  $1.00 \pm 0.26$ ; ERK,  $0.76 \pm 0.16$ ; AKT,  $0.67 \pm 0.16$ ; STAT,  $1.01 \pm 0.20$ ; OE: DMSO,  $1.24 \pm 0.23$ , ERK,  $0.86 \pm 0.15$ ; AKT,  $0.84 \pm 0.16$ ; STAT,  $1.24 \pm 0.23$ ), and (D) FA size (EV: DMSO,  $1.00 \pm 0.16$ ; ERK,  $1.20 \pm 0.19$ ; AKT,  $0.75 \pm 0.14$ ; STAT,  $0.99 \pm 0.19$ ; OE: DMSO,  $1.26 \pm 0.16$ ; ERK,  $1.49 \pm 0.19$ ; AKT,  $1.01 \pm 0.20$ ; STAT,  $1.24 \pm 0.20$ ). (E-H) Cumulative plots showing the relative ST6Gal-I OE to EV ratio for the morphometric and mechanical outcomes for each experimental set measured above: (E) RICM area (DMSO,  $1.30 \pm 0.03$ ; ERK,  $1.26 \pm 0.02$ ; AKT,  $1.09 \pm 0.01$ ; STAT,  $1.30 \pm 0.04$ ), (F) integrated intensity of open probes (DMSO,  $1.39 \pm 0.04$ ; ERK,  $1.14 \pm 0.01$ ; AKT,  $1.65 \pm 0.04$ ; STAT,  $1.32 \pm 0.04$ ), (G) number of FAs per cell (DMSO,  $1.26 \pm 0.09$ ; ERK,  $1.26 \pm 0.05$ ; AKT,  $1.09 \pm 0.03$ ; STAT,  $1.25 \pm 0.04$ ), and (H) FA size (DMSO,  $1.22 \pm 0.05$ ; ERK,  $1.06 \pm 0.09$ ; AKT,  $0.75 \pm 0.05$ ; STAT,  $1.23 \pm 0.14$ ). (mean  $\pm$  SD;  $n = 25$  cells across three independent experiments; <sup>ns</sup> $p > 0.05$ , \* $p < 0.05$ , \*\* $p < 0.01$ , \*\*\*\* $p < 0.0001$  by one-way ANOVA with Tukey's test).

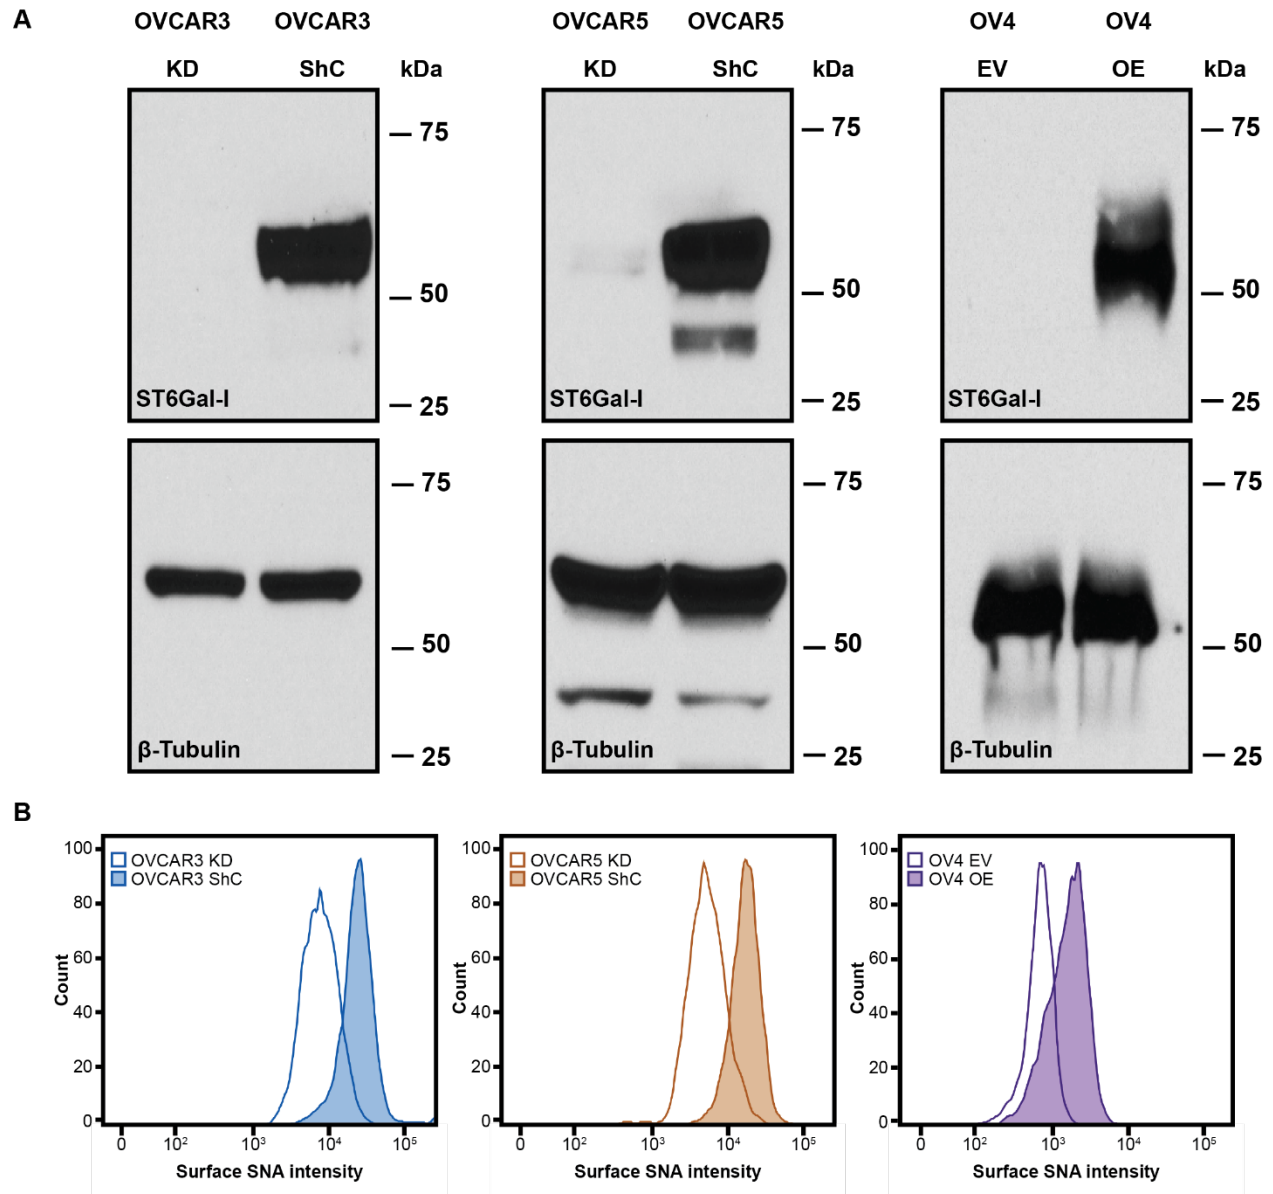

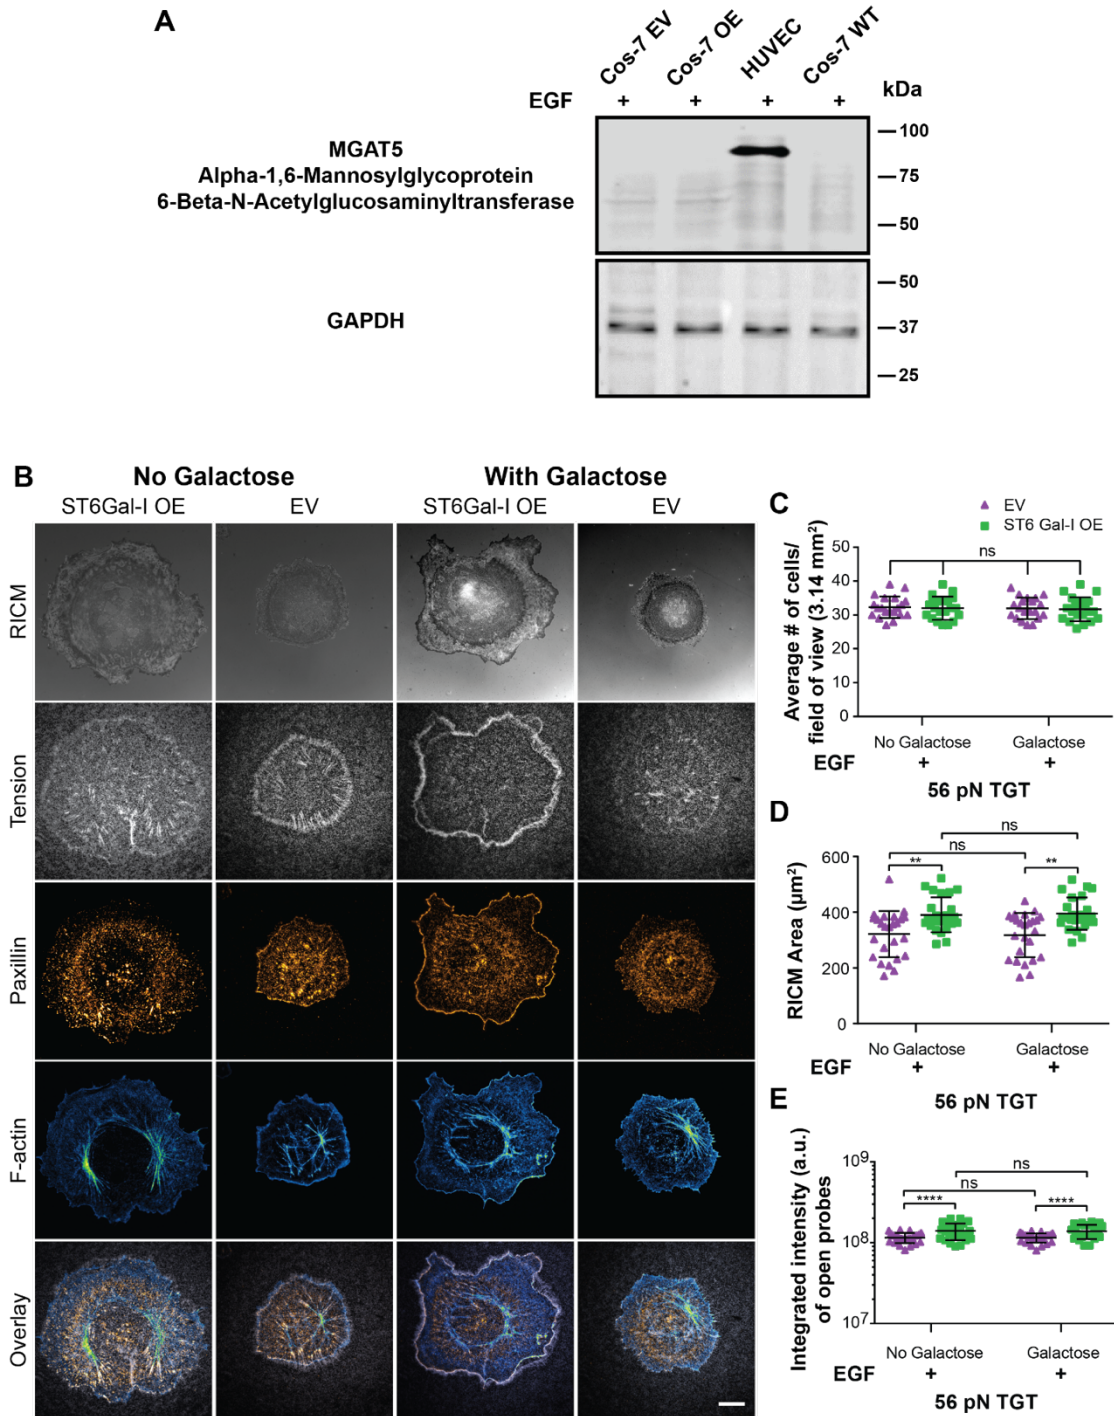

**Figure S8. MGAT5 does not influence ST6Gal-I mediated EGFR sialylation in Cos-7 cells.** (A) Representative immunoblots of MGAT5 from WT, EV and ST6Gal-I OE Cos-7 cells with (10 min) EGF stimulation. Human umbilical vein endothelial cell (HUVEC) lysate was used as a positive control. GAPDH was used as the loading control. (B) Images of empty vector (EV) and ST6Gal-I overexpressing (OE) Cos-7 cells on a 56 pN TGT surface 90 mins post plating in the presence of EGF with or without galactose pretreatment (RICM - raw image, integrin tension - grayscale, paxillin - orange hot, and actin - green blue; scale bar = 10 µm). (C-E) Quantification of the (C) average number of cells per field of



view (without galactose: EV,  $32 \pm 3.1$ ; OE,  $32 \pm 3.4$ ; with galactose: EV,  $32 \pm 3.2$ ; OE,  $32 \pm 3.5$ ), **(D)** cell spread area (without galactose: EV,  $321.6 \pm 83.0 \mu\text{m}^2$ ; OE,  $390.8 \pm 62.7 \mu\text{m}^2$ ; with galactose: EV,  $317.9 \pm 79.1 \mu\text{m}^2$ ; OE,  $395.0 \pm 57.8 \mu\text{m}^2$ ), and **(E)** integrated intensity of open probes (without galactose: EV,  $1.2 \cdot 10^8 \pm 1.6 \cdot 10^7$  a.u.; OE,  $1.40 \cdot 10^8 \pm 3.26 \cdot 10^7$  a.u.; with galactose: EV,  $1.2 \cdot 10^8 \pm 1.6 \cdot 10^7$  a.u.; OE,  $1.4 \cdot 10^8 \pm 2.7 \cdot 10^7$  a.u.) (mean  $\pm$  SD, n = 25 cells across three independent experiments; <sup>ns</sup>p > 0.05, \*\*p < 0.01, \*\*\*\*p < 0.0001 by one-way ANOVA with Tukey's test).
